# Supplementary material for: Administration of hydrogen-rich water prevents vascular aging of the aorta in LDL receptor-deficient mice
Source: Springer Nature journal article supplement (doi:10.1038/s41598-018-35239-0), 2018-11-08
Supplement: 41598_2018_35239_MOESM1_ESM.pdf [file 41598_2018_35239_MOESM1_ESM.pdf]

## Supplementary Information

### Administration of hydrogen-rich water prevents vascular aging of the aorta in LDL receptor-deficient mice

Masumi Iketani<sup>1</sup>, Kanako Sekimoto<sup>1,2</sup>, [Tsutomu Igarashi](#)<sup>3</sup>, Mayumi Takahashi<sup>1</sup>, Masaki Komatsu<sup>1,2</sup>, [Iwao Sakane](#)<sup>1,4</sup>, [Hiroshi Takahashi](#)<sup>3</sup>, Hideo Kawaguchi<sup>2</sup>, Ritsuko Ohtani-Kaneko<sup>2</sup>, Ikuroh Ohsawa<sup>1\*</sup>

<sup>1</sup>Biological Process of Aging, Tokyo Metropolitan Institute of Gerontology, Tokyo, Japan

<sup>2</sup>Department of Life Sciences, Toyo University, Gunma, Japan

<sup>3</sup>[Department of Ophthalmology, Nippon Medical School, Tokyo, Japan](#)

<sup>4</sup>[Central Research Institute, ITO EN Ltd., Makinohara, Japan](#)

\*Corresponding author: [iohsawa@tmig.or.jp](mailto:iohsawa@tmig.or.jp)

Supplementary Methods

Supplementary Figures 1-4

## **Supplementary Methods**

**SA- $\beta$ -Gal assay.** SA- $\beta$ -Gal staining of aortas was performed according to the manufacturer's instructions (Cell Signaling, Danvers, MA, USA). Mouse thoracic aortas were excised and stored in phosphate-buffered saline on ice until fixation. Aortas were fixed with 1 × Fixative Solution for 15 min at room temperature, washed twice with phosphate-buffered saline, and incubated overnight in staining solution at 37 °C.

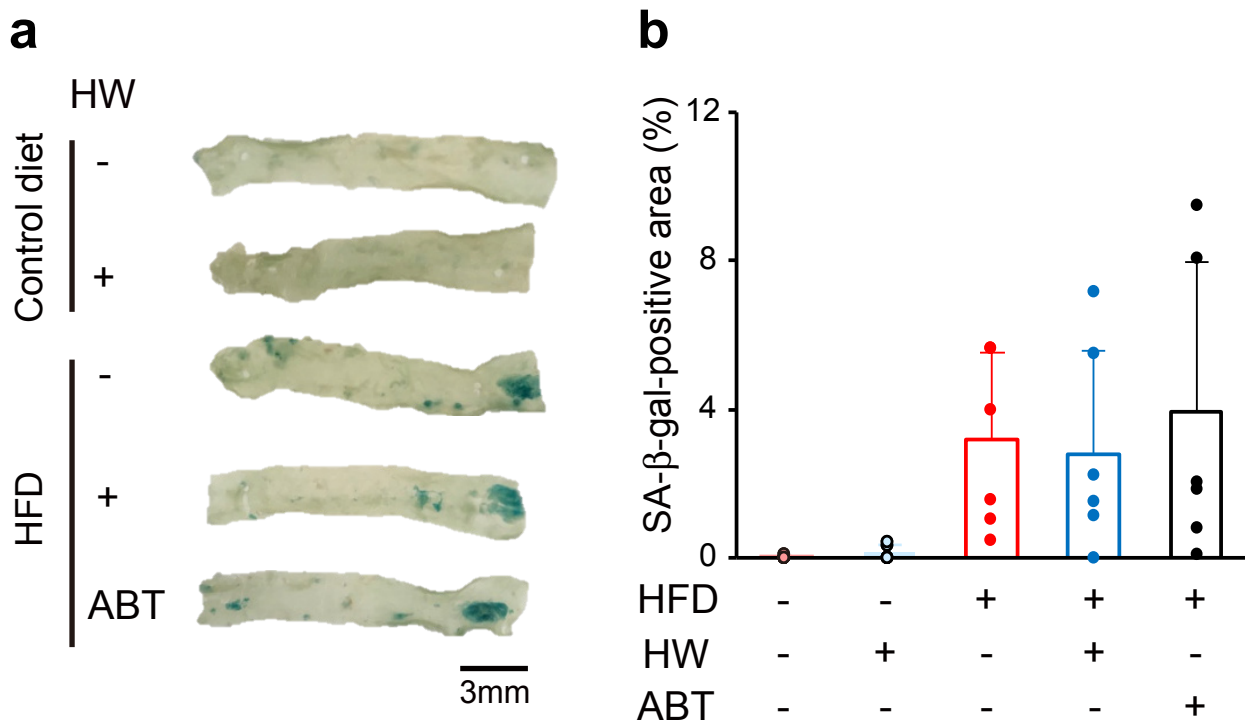

**Supplementary Figure 1.** Drinking HW did not decrease aortic SA-β-gal staining in *Ldlr*<sup>-/-</sup> mice. **(a)** The SA-β-gal-positive area in the thoracic aorta was increased in the HFD-fed groups. **(b)** Quantitative analysis of the SA-β-gal-positive area in the aorta. Neither HW nor ABT-263 (ABT) suppressed the increase in the SA-β-gal-positive area. Values are the mean ± SD (n = 6).

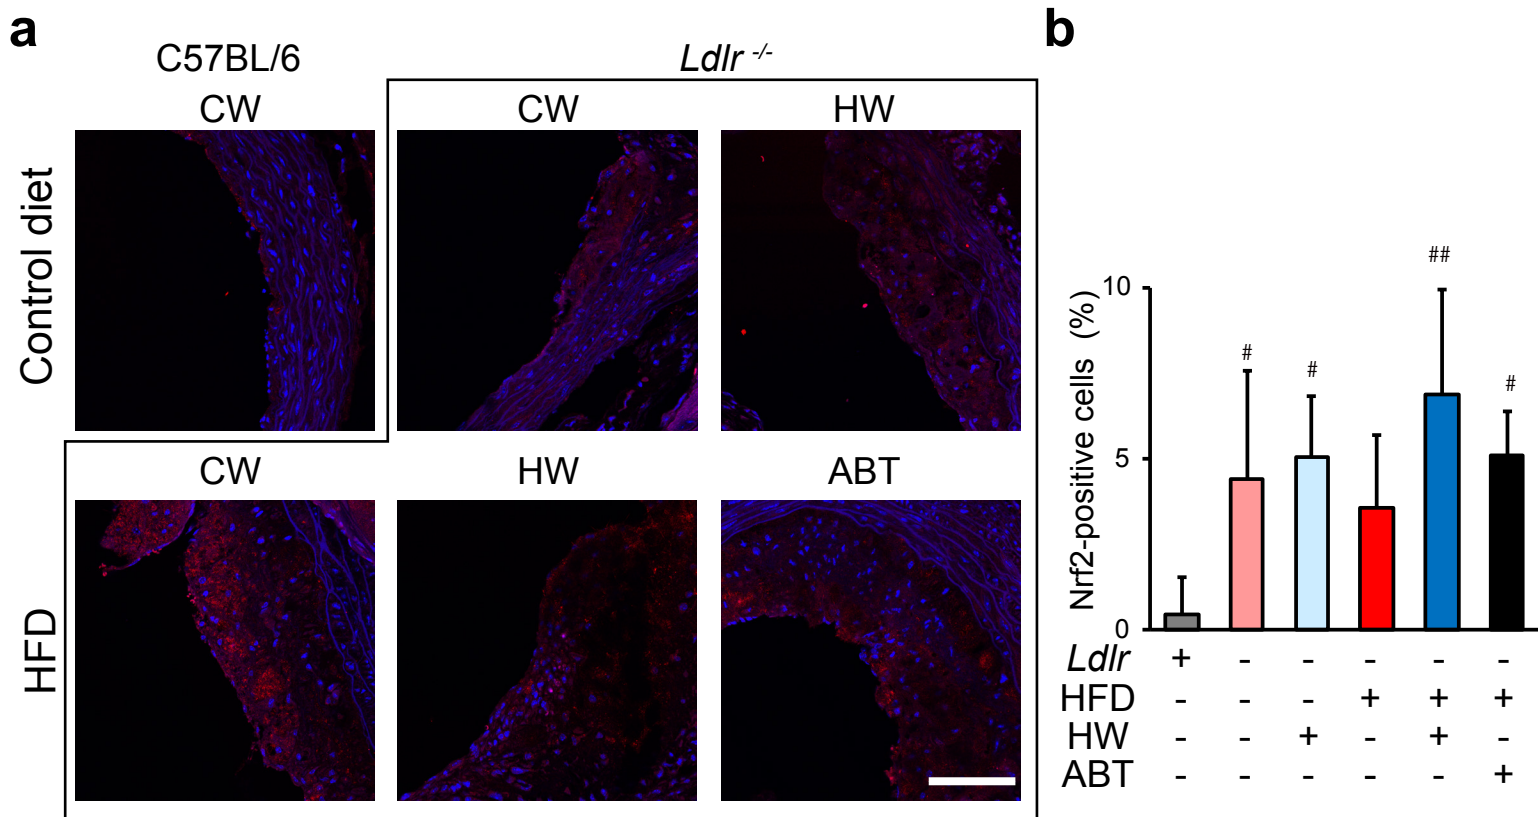

**Supplementary Figure 2.** Drinking HW increased Nrf2 positive cells in the aorta of HFD-fed *Ldlr*<sup>-/-</sup> mice. (a) Immunohistochemical staining for Nrf2 (red) and Hoechst nuclear staining (blue) in the aortic intima. Nrf2-positive cells were increased in HFD mice given control water (CW). This increase was further enhanced by both HW and ABT-263 (ABT). Scale bar: 100  $\mu$ m. (b) Quantitative analysis of Nrf2-positive cells in the aortic intima. #*P* < 0.05 and ##*P* < 0.01 vs. C57BL/6 *Ldlr*<sup>+/+</sup> control mice.

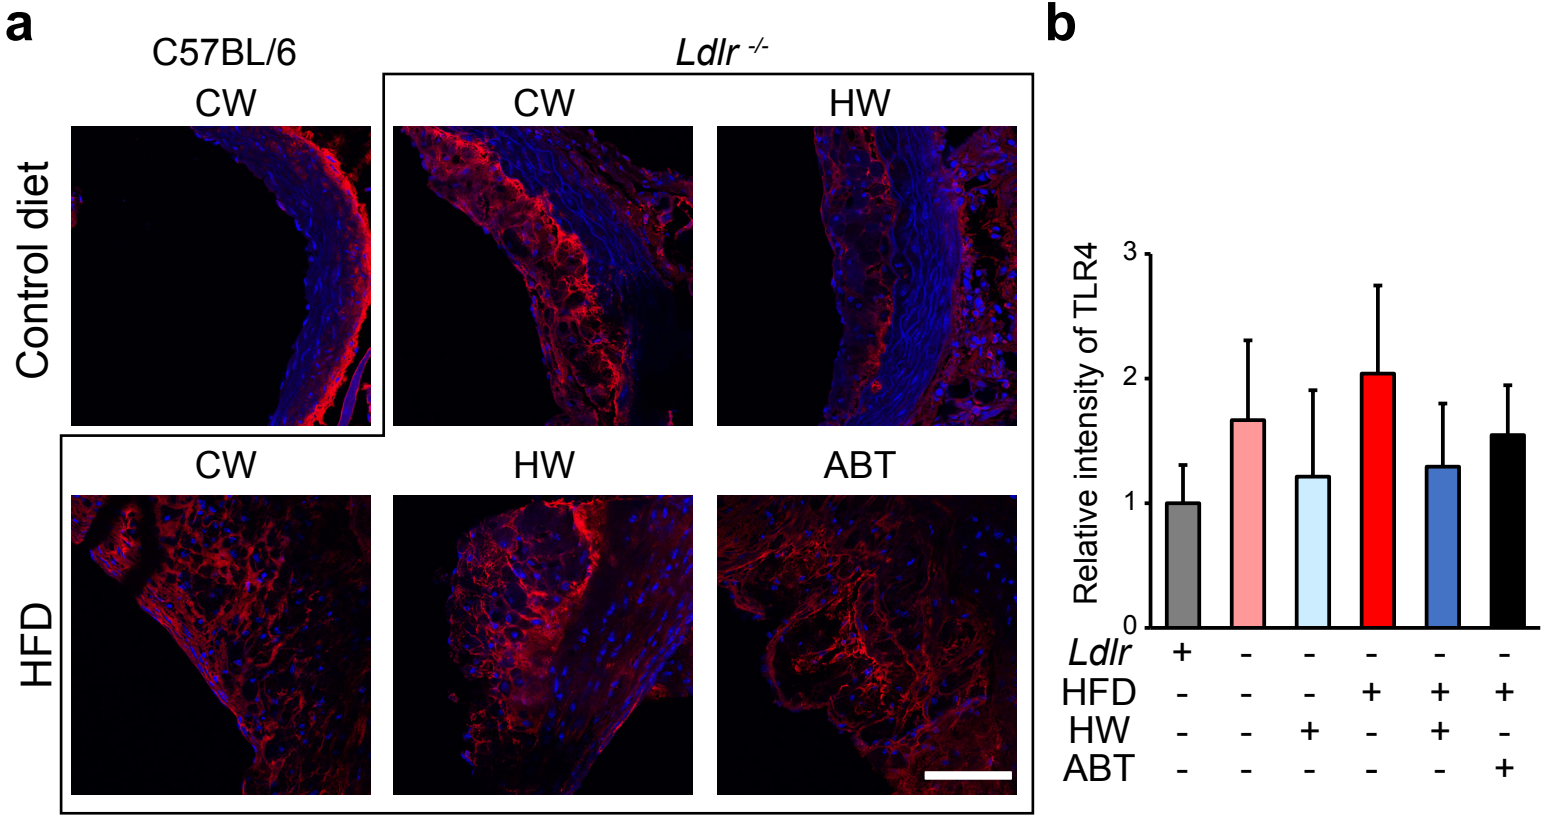

**Supplementary Figure 3.** Effect of drinking HW on the expression of TLR4 in the aorta of HFD-fed *Ldlr*<sup>-/-</sup> mice. **(a)** Immunohistochemical staining for TLR4 (red) and Hoechst nuclear staining (blue) in the aortic intima. Scale bar: 100  $\mu$ m. **(b)** Quantitative analysis of TLR4-intensity in the aortic intima.

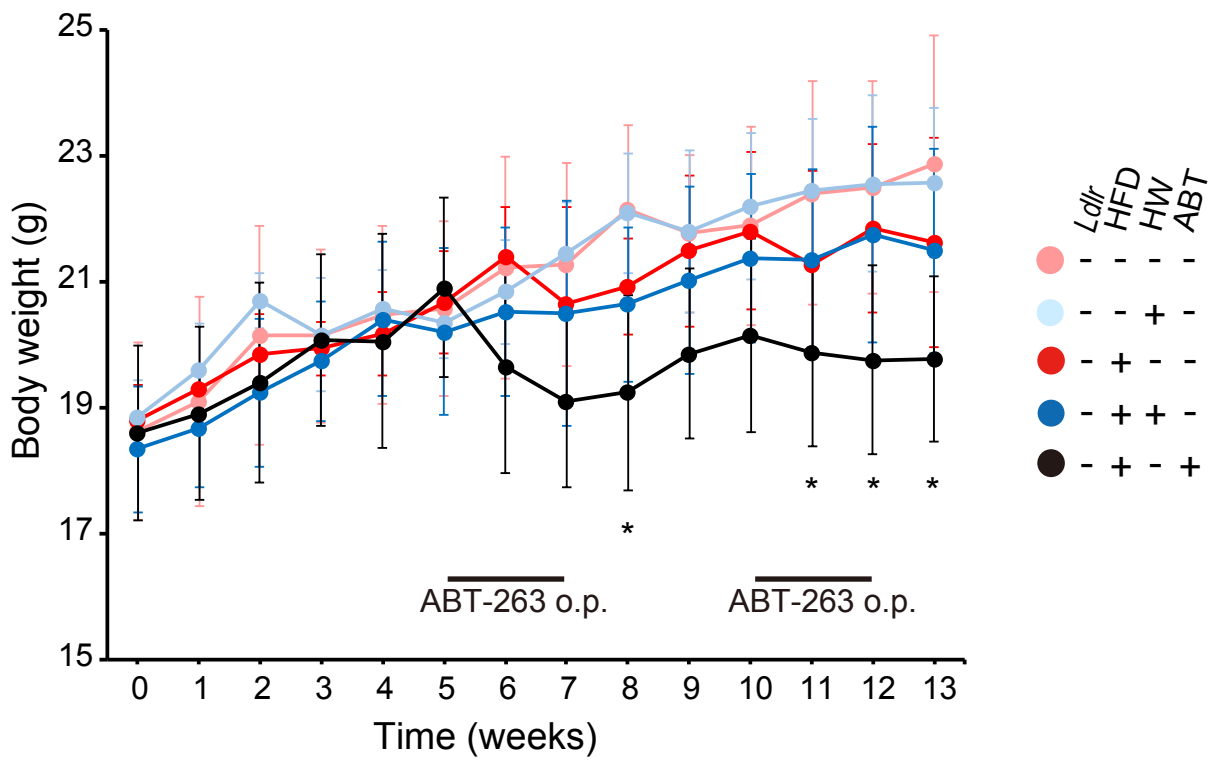

**Supplementary Figure 4.** Weight gain in *Ldlr*<sup>-/-</sup> mice was prevented by ABT-263. Values are the mean  $\pm$  SD (n = 6). \**P* < 0.05.
